# Supplementary material
Source: PubMed Central journal article supplement (PMC4413345)
Supplement: pnas.201421949SI.pdf [file pnas.201421949SI.pdf]

# Supporting Information

Akiyama et al. 10.1073/pnas.1421949112

## SI Materials and Methods

**Simultaneous Cell Proliferation and Cell Death Analyses.** Serial transverse sections of E9.75 embryos were stained for pHis3 and TUNEL. Two sections from each of anterior, middle and posterior region per embryo were used for counting DAPI-positive nuclei, pHis3-positive and TUNEL-positive cells in the mesenchyme of nascent limb buds. Average of proliferation index (pHis3/DAPI) and cell death index (TUNEL/DAPI) of each region of three *Sall4* CKO embryos and three wild-type control embryos were used for statistical analysis by the Student's *t* test, and shown as average  $\pm$  SD. *P* values are indicated within each panel.

**Quantitative RT-PCR.** Embryos at E9.5–E9.75 were collected and the posterior part of the body, including the hindlimb forming region/hindlimb buds, was collected. The posterior body was pushed to a plastic dish from the dorsal side by fine forceps in PBS, and tissue lateral to the somites were dissected using a fine tungsten needle. The collected tissue, termed as the lateral tissue, contains the lateral plate mesoderm/nascent hindlimb mesenchyme, surface ectoderm and some other surrounding tissue, but excluded the neural tissue, where *Irx3* and *Irx5* are expressed and *Tcre*-mediated recombination does not occur.

The lateral tissue from ~12–15 embryos with the same genotype were pooled as one group, and RNA was extracted by using RNeasy micro (QIAGEN) according to the manufacture's in-

struction. The reverse transcription reaction was done using SuperScript III (Invitrogen) and oligo dT primer, and quantitative PCR was done using GoTaq qPCR master mix (Promega) and a Mastercycler qPCR machine (Eppendorf). For both wild type and *Sall4* CKO genotypes, three groups were examined. Primer sequences for *Sall4*, *Irx3*, and *Irx5* were obtained from the PrimerBank ([pga.mgh.harvard.edu/primerbank/index.html](http://pga.mgh.harvard.edu/primerbank/index.html)) (1). Relative expression levels were determined by the delta-delta Ct method with the Ct value for *Gapdh*. Statistical analysis was done by the Student's *t* test, and shown as average  $\pm$  SD. *P* values are indicated within each panel.

## Primer Sequences for qRT-PCR.

*Sall4* FW: GAAGTGTCAAGTCCCGGTCTC

*Sall4* RV: GGCTGTGCTCGGATAAATGT

*Irx3* FW: GGCAATGCTTATGGGAGCGA

*Irx3* RV: CGCTGTCTAAGTTTTCCAAATCG

*Irx5* FW: CGCCACATCCTCGGACAAG

*Irx5* RV: GCGCCGTGTAATAAAGAGGC

*Gapdh* FW: CAATGACCCCTTCATTGACC

*Gapdh* RV: GATCTCGTCTCTGGAAGATG

1. Wang X, Spandidos A, Wang H, Seed B (2012) PrimerBank: A PCR primer database for quantitative gene expression analysis, 2012 update. *Nucleic Acids Res* 40(Database issue): D1144–D1149.

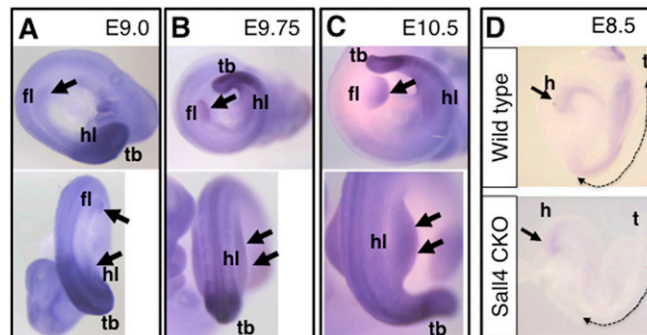

**Fig. S1.** *Sall4* expression pattern in wild type embryos and confirmation of early inactivation of *Sall4* by *Tcre*. (A–C) in situ hybridization of *Sall4* at E9.0 (A), E9.75 (B), and E10.5 (C). *Sall4* is broadly expressed at E9.0 (A) and E9.75 (B), and its expression is prominent in the tail bud region. (C) *Sall4* is expressed in the distal region of the forelimb bud, but is still broadly expressed in the hindlimbs. (D) *Sall4* in situ hybridization in wild type and *Tcre*; *Sall4* CKO embryos at E8.5. *Sall4* mRNA was undetectable using an exon 2 probe, which is deleted in *Sall4* cKO mice. fl: forelimb region/forelimb buds, h; head, hl: hindlimb region/hindlimb buds, tb: tail bud.

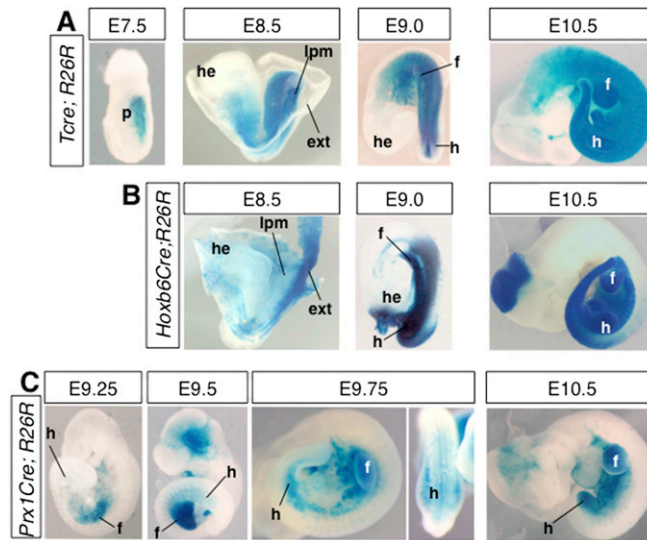

**Fig. S2.** Recombination by *Tcre*, *Hoxb6Cre* and *Prx1Cre*, visualized by R26R-LacZ reporter. Whole mount LacZ stained embryos of *Tcre; R26R* (A), *Hoxb6Cre; R26R* (B), and *Prx1Cre; R26R* (C) at indicated developmental stages. (A) Recombination by the *Tcre* is detected as early as E7.5 in the posterior part of the body, and broadly in E8.5 embryos. The recombined regions include forelimb-forming region/forelimb buds and hindlimb-forming region/hindlimb bud. (B) Recombination by the *Hoxb6Cre* was detected in the extraembryonic tissue, but not in the embryo portion at E8.5. Strong recombination was detected in the lateral plate mesoderm by E9.0. (C) Recombination by the *Prx1Cre* was detected in the forelimb bud at E9.25, and recombination in the hindlimb bud was detected at E9.75. Abbreviations, ext: extra embryonic tissue, f: forelimb-forming region/forelimb buds, h: hindlimb-forming region/hindlimb buds, ipm: lateral plate mesoderm, he: head, p: posterior.

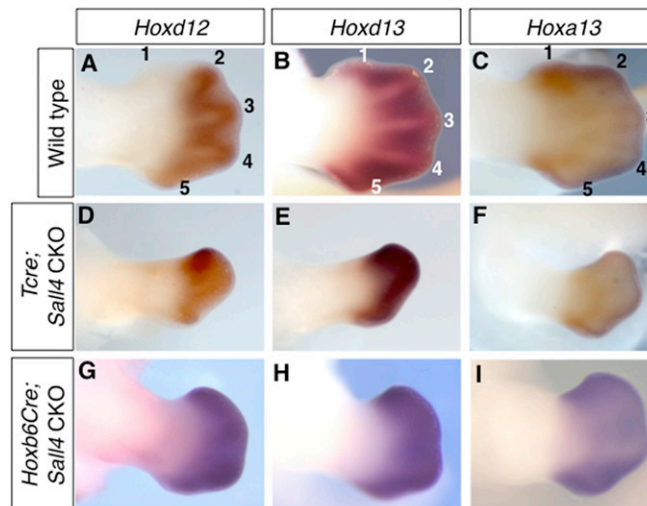

**Fig. S3.** Expression pattern of *Hoxd12*, *Hoxd13*, and *Hoxa13* in *Tcre; Sall4* and *Hoxb6Cre; Sall4* CKO hindlimbs. Dorsal views of E12.5 hindlimbs hybridized with indicated probes. (A and B) *Hoxd12* signals were excluded from d1 primordia, whereas *Hoxd13* signals cover all digit primordia in wild-type. (D, E, G, and H) In both *Tcre; Sall4* CKO (D and E) and *Hoxb6Cre; Sall4* CKO (G and H) hindlimbs, all digit primordia were positive for both *Hoxd12* and *Hoxd13* expression. (C, F, and I) *Hoxa13* expression was detected in the autopod in wild-type (C), *Tcre; Sall4* CKO (F), and *Hoxb6Cre; Sall4* CKO (I) hindlimbs. Digit primordia are numbered in wild-type images.

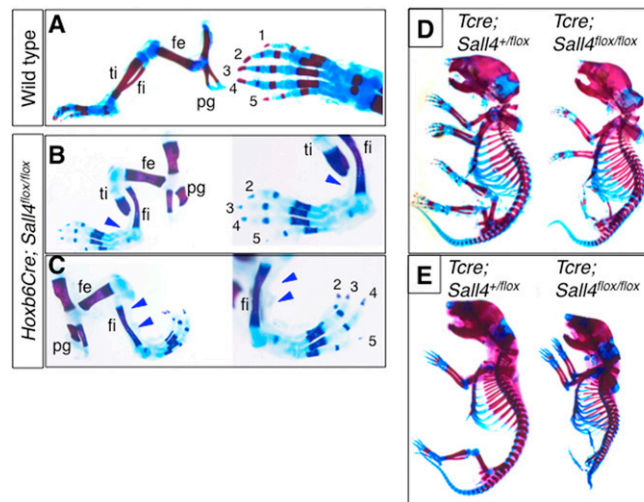

**Fig. 54.** Zeugopod phenotypes of *Hoxb6Cre*; *Sall4* KO mutants and two examples of entire skeletal staining of *Tcre*; *Sall4* KO mice. (A) Hindlimb skeleton of neonatal wild-type mice. (B and C) Hindlimb skeletons of a *Hoxb6Cre*; *Sall4* KO neonatal mouse. Only this mutant exhibited tibia hypoplasia, denoted by arrowheads. ti: tibia, fi: fibula, fe: femur, pg: pelvic girdle. Digits are numbered as 1–5. (D) A typical neonatal *Tcre*; *Sall4* KO mutant and a littermate. This mutant possesses three digits in hindlimbs. (E) A severely affected neonatal *Tcre*; *Sall4* KO mutant and a littermate. The mutant exhibited reduction of the entire body size.

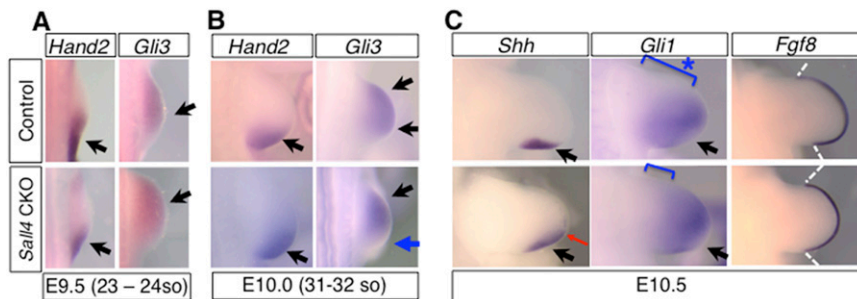

**Fig. 55.** Gene expression in forelimb buds of wild-type and *Sall4* KO embryos. (A and B) *Gli3* and *Hand2* expression at E9.5 (A) and E10.0 (B). (C) Expression patterns of *Shh*, *Gli1*, and *Fgf8* at E10.5. *Shh* expression exhibited a subtle change, and the *Gli1*-free domain in the anterior portion exhibited a slight decrease. The expression pattern of *Fgf8* also exhibited subtle alterations.

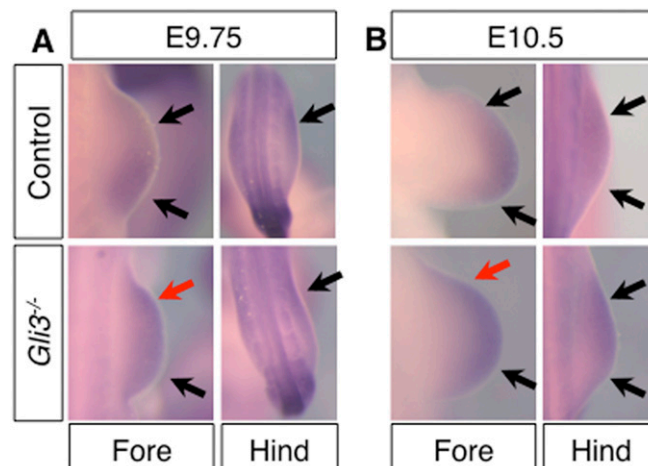

**Fig. 56.** Expression pattern of *Sall4* in *Gli3* mutants. In situ hybridization of *Sall4* in wild-type and *Gli3*<sup>-/-</sup> embryos at E9.75 (A) and E10.5 (B). *Sall4* expression appears to be slightly higher in the anterior part of forelimb buds (red arrows), compared with wild type. Black arrows point to normal expression.

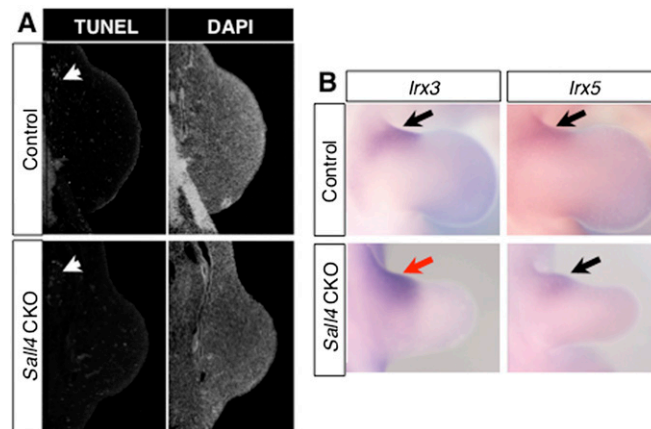

**Fig. S7.** Additional analyses of *Irx3/5* in *Tcre; Sall4* CKO embryos. (A) Comparable cell death between control and *Sall4* CKO hindlimb buds at E10.5. TUNEL and DAPI signals are shown in coronal sections. A cluster of a few TUNEL positive cells was similarly detected in the anterior-proximal region of both control and *Sall4* CKO hindlimb buds. (B) Expression pattern of *Irx3* and *Irx5* at E11.5 in control and *Sall4* CKO hindlimb buds. Black arrows point to normal expression, and a red arrow points to *Irx3* expression, which appears to be slightly stronger than that in wild-type control hindlimb buds.

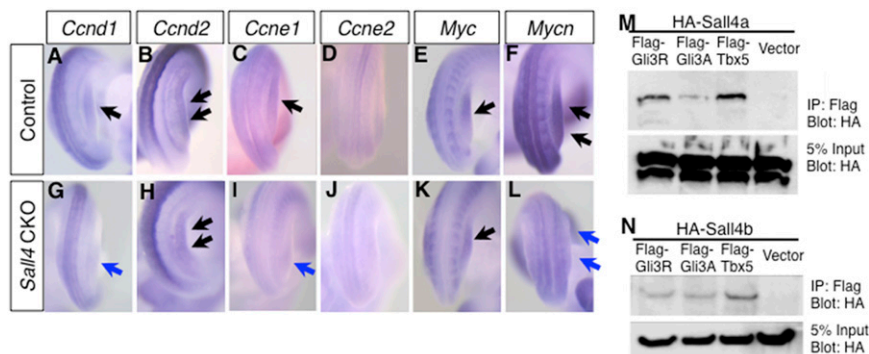

**Fig. S8.** Expression pattern of cell cycle progression-related genes and coimmunoprecipitation of SALL4a and SALL4b with GLI3. (A–L) Expression of *Ccnd1* (A and G), *Ccnd2* (B and H), *Ccne1* (C and I), *Ccne2* (D and J), *Myc* (E and K) and *Mycn* (F and L) in wild type (A–F) and *Sall4* CKO (G–L) embryos at E9.75. Black arrows and blue arrows point to normal and reduced expression, respectively. (M and N) SALL4a and SALL4b can interact with GLI3. HA-Sall4a (M) or HA-Sall4b (N) is cotransfected with Flag-tagged truncated *Gli3* (*Gli3R*), Flag-tagged full-length *Gli3* (*Gli3A*), Flag-tagged *Tbx5* or empty vector in HEK293T cells. TBX5 is used as a positive control for SALL4 interaction.

**Table S1. Summary of digit number of *Sall4* mutants using different Cre lines**

| Number of digits | <i>Tcre; Sall4</i> CKO | <i>Hoxb6Cre; Sall4</i> CKO | <i>Prx1Cre; Sall4</i> CKO |
|------------------|------------------------|----------------------------|---------------------------|
| 1                | 1 (2.6%)               | 0 (0%)                     | 0 (0%)                    |
| 2                | 11 (28.9%)             | 0 (0%)                     | 0 (0%)                    |
| 3                | 23 (60.5%)             | 4 (7.7%)                   | 0 (0%)                    |
| 4                | 3 (7.9%)               | 26 (50.0%)                 | 0 (0%)                    |
| 5                | 0 (0%)                 | 22 (42.3%)                 | 62 (100%)                 |
| Number of limbs  | 38                     | 52                         | 62                        |

**Table S2. Summary of tibia and femur phenotype**

| Phenotype                       | <i>Tcre; Sall4</i> CKO | <i>Hoxb6Cre; Sall4</i> CKO | <i>Prx1Cre; Sall4</i> CKO |
|---------------------------------|------------------------|----------------------------|---------------------------|
| Absence of tibia                | 38 (100%)              | 2* (3.8%)                  | 0 (0%)                    |
| Small cartilage in the stylopod | 38 (100%)              | 0 (0%)                     | 0 (0%)                    |
| Number of limbs                 | 38                     | 52                         | 62                        |

\*The tibia was partially developed (not complete absence).

**Table S3. Frequency of obtaining *Tcre*; *Sall4* CKO pups**

| Breeding scheme                                                                                        | Number of pups | Number of CKO pups | Frequency of neonatal mutants |
|--------------------------------------------------------------------------------------------------------|----------------|--------------------|-------------------------------|
| ♂ <i>Tcre</i> <sup>+Tg</sup> ; <i>Sall4</i> <sup>+fflox</sup><br>♀ <i>Sall4</i> <sup>flox/flox</sup>   | 17             | 3                  | 17.7%                         |
| ♂ <i>Tcre</i> <sup>Tg/Tg</sup> ; <i>Sall4</i> <sup>+fflox</sup><br>♀ <i>Sall4</i> <sup>flox/flox</sup> | 236            | 16                 | 6.8%                          |
